# Supplementary material for: Monkeys exhibit human-like gaze biases in economic decisions
Source: eLife. 2023 Jul 27;12:e78205. doi: 10.7554/eLife.78205 (PMC10465126; doi:10.7554/eLife.78205)
Supplement: Supplementary file 1. — All models included a monkey-specific slope and intercept for each effect. In Wilkinson notation, this is indicated by including (1+effect(s) | monkey). In line 14, the colon (:) indicates an interaction term. [file elife-78205-supp1.xlsx]

## Sheet: revisedTable_reformat
		Behavioral Effect		Regressors		Equation(s)		Figure(s)
		Basic Psychometrics
		Basic Psychometrics
1		Choice (Left = 1, Right = 0) x Value Difference		Value Difference		Choice ~ logit(value-difference)		1D
2		Reaction Time (RT) x Difficulty		Difficulty		RT ~difficulty		1E
3		Number of Fixations (Num. Fix.) x Difficulty		Difficulty		Num. Fix. ~difficulty		1F
		Contributions of Difficulty and Chosen Value on RT and Fixations
4		Independent Contribution of Chosen Value (DV = RT or Num. Fix)		Chosen Value (chosen-value) Difficulty (difficulty)		Model 1: DV ~difficulty Model 2: ResidModel1 ~ chosen-value		2A/B
5		Independent Contribution of Difficulty (DV = RT or Num. Fix)		Chosen Value Difficulty		Model 1: DV ~ chosen-value Model 2: ResidModel1 ~ difficulty		2C/D
		Gaze Behavior and Basic Fixation Properties
		Fixation Durations Depend on Relative and Absolute Order in the Trial
6		Independent Effect of Absolute Order		Relative Order (Final = 1, Non-Final = 0; relativeOrder) Absolute Order (1st, 2nd, etc.; absoluteOrder)		Model 1: Fixation Duration ~ relativeOrder Model 2: ResidModel1 ~ absoluteOrder		3
7		Independent Effect of Relative Order		Absolute Order (1st, 2nd, etc.; absoluteOrder) Relative Order (Final = 1, Non-Final = 0; relativeOrder)		Model 1: Fixation Duration ~ categorical(absoluteOrder) Model 2: ResidModel1 ~ relativeOrder		3
		Fixation Durations Depend on Target Value
8		Initial Fixation Duration x Fixated Target Value		Value of Fixated Target ( ValueFixated)		Initial Fixation Duration ~ fixValue		-
9		Middle Fixation Duration x Fixated Target Value		Value of Fixated Target ( ValueFixated)		Middle Fixation Duration ~ fixValue		-
10		Middle Fixation Duration x Not-Fixated Target Value		Value of Non-Fixated Target (nofixValue)		Middle Fixation Duration ~ nofixValue		-
11		Middle Fixation Duration x Relative Target Value		Relative Target Value (relativeFixVal)		Middle Fixation Duration ~ relativeFixVal		-
12		Middle Fixation Duration x Difficulty		Difficulty		Middle Fixation Duration ~ difficulty		-
		Gaze-Related Choice Biases
		Initial Fixation Bias
13		Standard Sessions		Value Difference		Choice ~ logit(value-difference + first-is-left)		-
				Initial Fixation Location (1 =Left, 0 = Right; first-is-left)
14		Gaze Manipulation Sessions		Value Difference		Choice ~ logit(value-difference + first-is-left + trial-type + first-is-left:trial-type		5
				Initial Fixation Location
				Trial-Type (1 = staggered, 0 = simultaneous; trial-type)
		Cumulative Gaze-Time Bias
15		Standard Choice		Left Time Advantage (time-advantage)		Choice ~ logit(time-advantage)		6B/C
16		Value-Corrected Choice		Left Time Advantage		Value-Corrected Choice ~ time-advantage		6D/E
		Final Fixation Bias
17		Final Fixation Bias		Value Difference		Choice ~ logit(value-difference + last-is-left)		7
				Final Fixation Location (1 =Left, 0 = Right; last-is-left)
		Gaze-Weighted Linear Accumulator Model
		Out-of-Sample Goodness-of-Fit
18		Choice		isSimulated (simulated trial = 1, observed trial = 0)		Choice ~ logit(isSimulated)		9A/D
19		RT		isSimulated (simulated trial = 1, observed trial = 0)		RT ~ isSimulated		9B/E
20		Value-Corrected Choice		isSimulated (simulated trial = 1, observed trial = 0)		Value-Corrected Choice ~ isSimiluated		9C/F
