# Supplementary material for: Monkeys exhibit human-like gaze biases in economic decisions
Source: eLife. 2023 Jul 27;12:e78205. doi: 10.7554/eLife.78205 (PMC10465126; doi:10.7554/eLife.78205)
Supplement: Supplementary file 2. — Maximum a posteriori (MAP) and 97.5 highest posterior density (HPD) interval for each parameter obtained from fitting each variant to all data available for each monkey. Note that for “Bias Model”, γ was a free parameter in the model, while in the “No Bias Model”, γ was fixed at 1. γ, gaze bias parameter; σ, noise parameter; τ, logistic scaling parameter; ν, velocity parameter. WAIC, widely applicable information criteria. See Methods for further details on parameter definitions. [file elife-78205-supp2.xlsx]

## Sheet: Bias vs. No Bias
	Monkey C		Monkey K
	Bias Model	No Bias Model	Bias Model	No Bias Model
γ - MAP	0.089	1	-0.061	1
HPD 2.5	0.064	1	-0.081	1
HPD 97.5	0.12	1	-0.031	1
σ - MAP	0.2	0.21	0.17	0.21
HPD 2.5	0.19	0.2	0.17	0.2
HPD 97.5	0.2	0.21	0.17	0.21
t - MAP	0.27	0.19	0.31	0.2
HPD 2.5	0.26	0.18	0.3	0.2
HPD 97.5	0.27	0.19	0.31	0.21
ν - MAP	2.31	2.35	2.2	2.27
HPD 2.5	2.3	2.34	2.2	2.26
HPD 97.5	2.32	2.36	2.21	2.28
WAIC	-15396.9	-12039	-18570.9	-10411.2
Std. Error	246.87	247.02	232.64	224.5
