# Supplementary material for: Monkeys exhibit human-like gaze biases in economic decisions
Source: eLife. 2023 Jul 27;12:e78205. doi: 10.7554/eLife.78205 (PMC10465126; doi:10.7554/eLife.78205)
Supplement: Supplementary file 3. — Table entries give the WAIC with standard errors in parentheses * indicates models where the standard errors for the two models do not overlap, indicating the fits are statistically different from each other. [file elife-78205-supp3.xlsx]

## Sheet: NDTsweepWAIC
	WAIC (SE)
	Multiplicative	Additive
NDT
0ms	-40791.81 (343.35)	-40040.03 (338.1)
50ms	-36661.06 (341.38)	-35839.78 (341.39)
100ms	-33072.05 (344.92)	-31762.69 (344.59)
150ms	-30849.61 (353.41)	-29069.38 (352.34)
200ms	-30168.18 (368.04)	-27779.11 (366.18)
300ms	-26680.32 (390.3)	-24203.94 (392.17)
400ms	-24138.04 (363.27)	-23070.16 (361.39)
