# Supplementary material for: Monkeys exhibit human-like gaze biases in economic decisions
Source: eLife. 2023 Jul 27;12:e78205. doi: 10.7554/eLife.78205 (PMC10465126; doi:10.7554/eLife.78205)
Supplement: Supplementary file 4. — Estimates and confidence intervals are the result of mixed effects models where each metric was regressed against a binary variable indicating whether the data were from the predicted trials or the observed trials. Confidence intervals including zero indicate no significant difference between predicted vs. observed, i.e. that the predicted data are a good fit to out of sample observations. The choice metric was assessed using a logistic regression. The others were linear. All models included “Monkey” as a random effect. p-values were obtained from an ANOVA on the output of the mixed effects regressions. [file elife-78205-supp4.xlsx]

## Sheet: Sheet1
Metric		Estimate		Confidence Interval				p-Value		Figure
Choice (1 = left, 0 = right)		-0.041		[-0.12, 0.042]				0.33		9 A/D
Reaction Time		0.00075		[-0.0034, 0.0012]				0.57		9 B/E
Value-corrected choice probability		-5.71e-17		[-0.0060, 0.0060]				1		9 C/F
